# Supplementary material for: Genomics of Ecological Adaptation in Cactophilic Drosophila
Source: PubMed Central journal article supplement (PMC4316639; doi:10.1093/gbe/evu291), 2014-12-31
Supplement: supp_evu291_Supplementary_Figures_1-6.pdf [file supp_evu291_Supplementary_Figures_1-6.pdf]

Tel

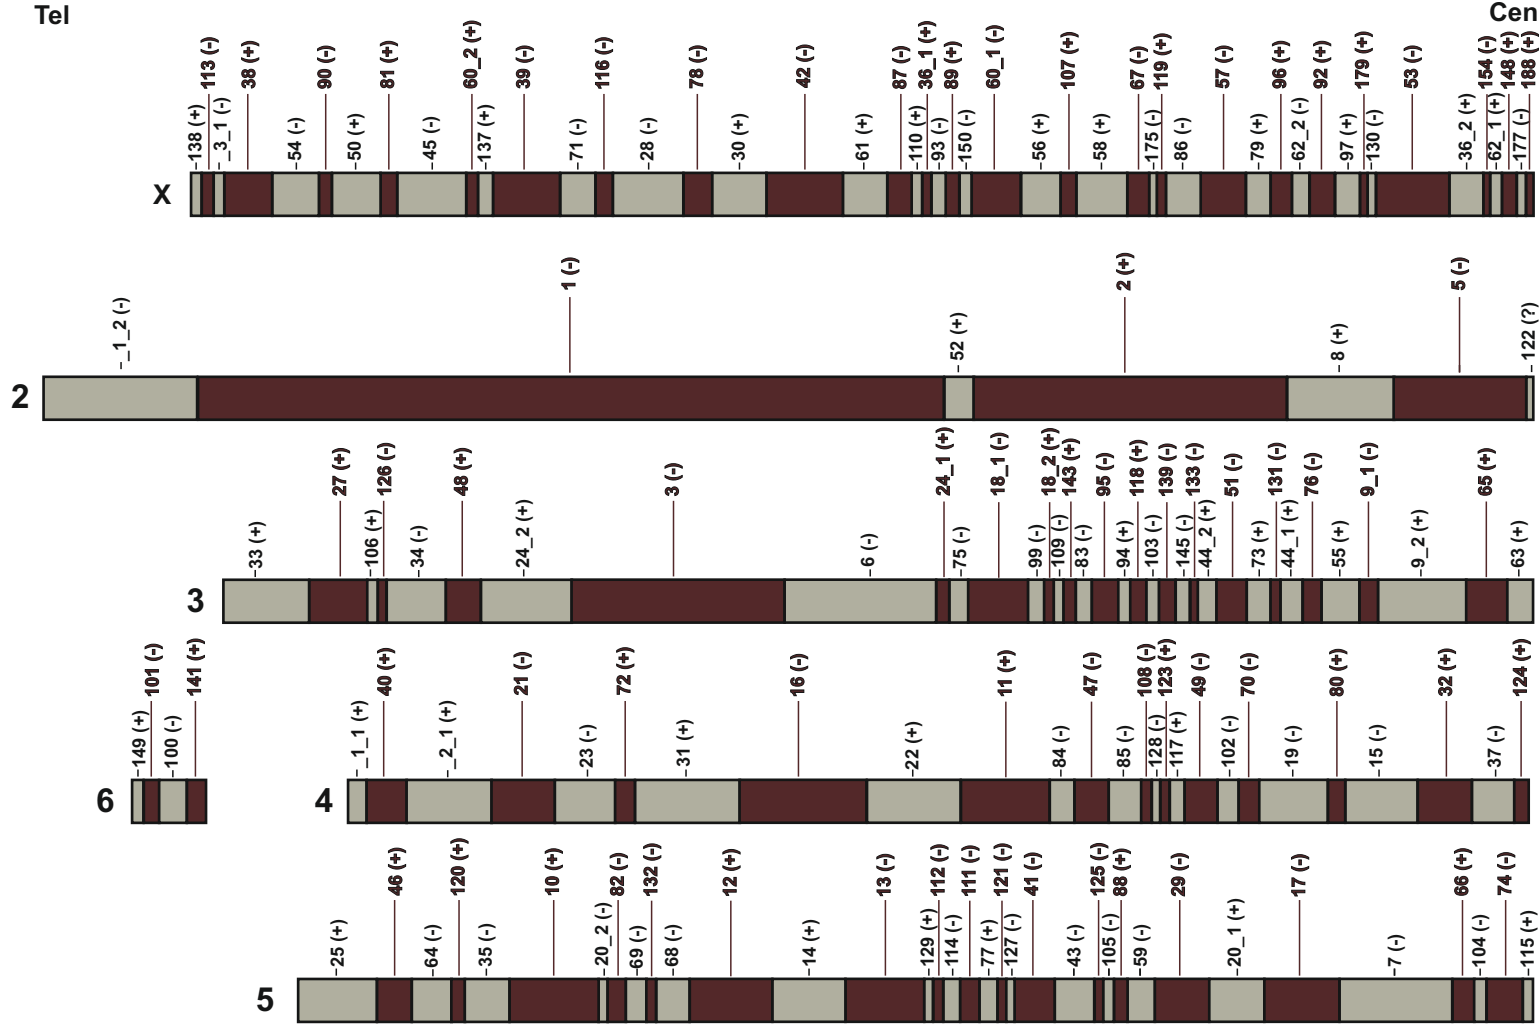

**Figure S1.** Order and orientation within *D. buzzatii* chromosomes of 158 scaffolds included in N90 index. The number of scaffolds in chromosomes X, 2, 3, 4, 5 and 6 is 48, 7, 38, 26, 35 and 4, respectively. Each scaffold is represented as a solid block and its orientation relative to telomere is marked by a positive (+) or negative (-) sign next to its identification number (? if direction is unknown).

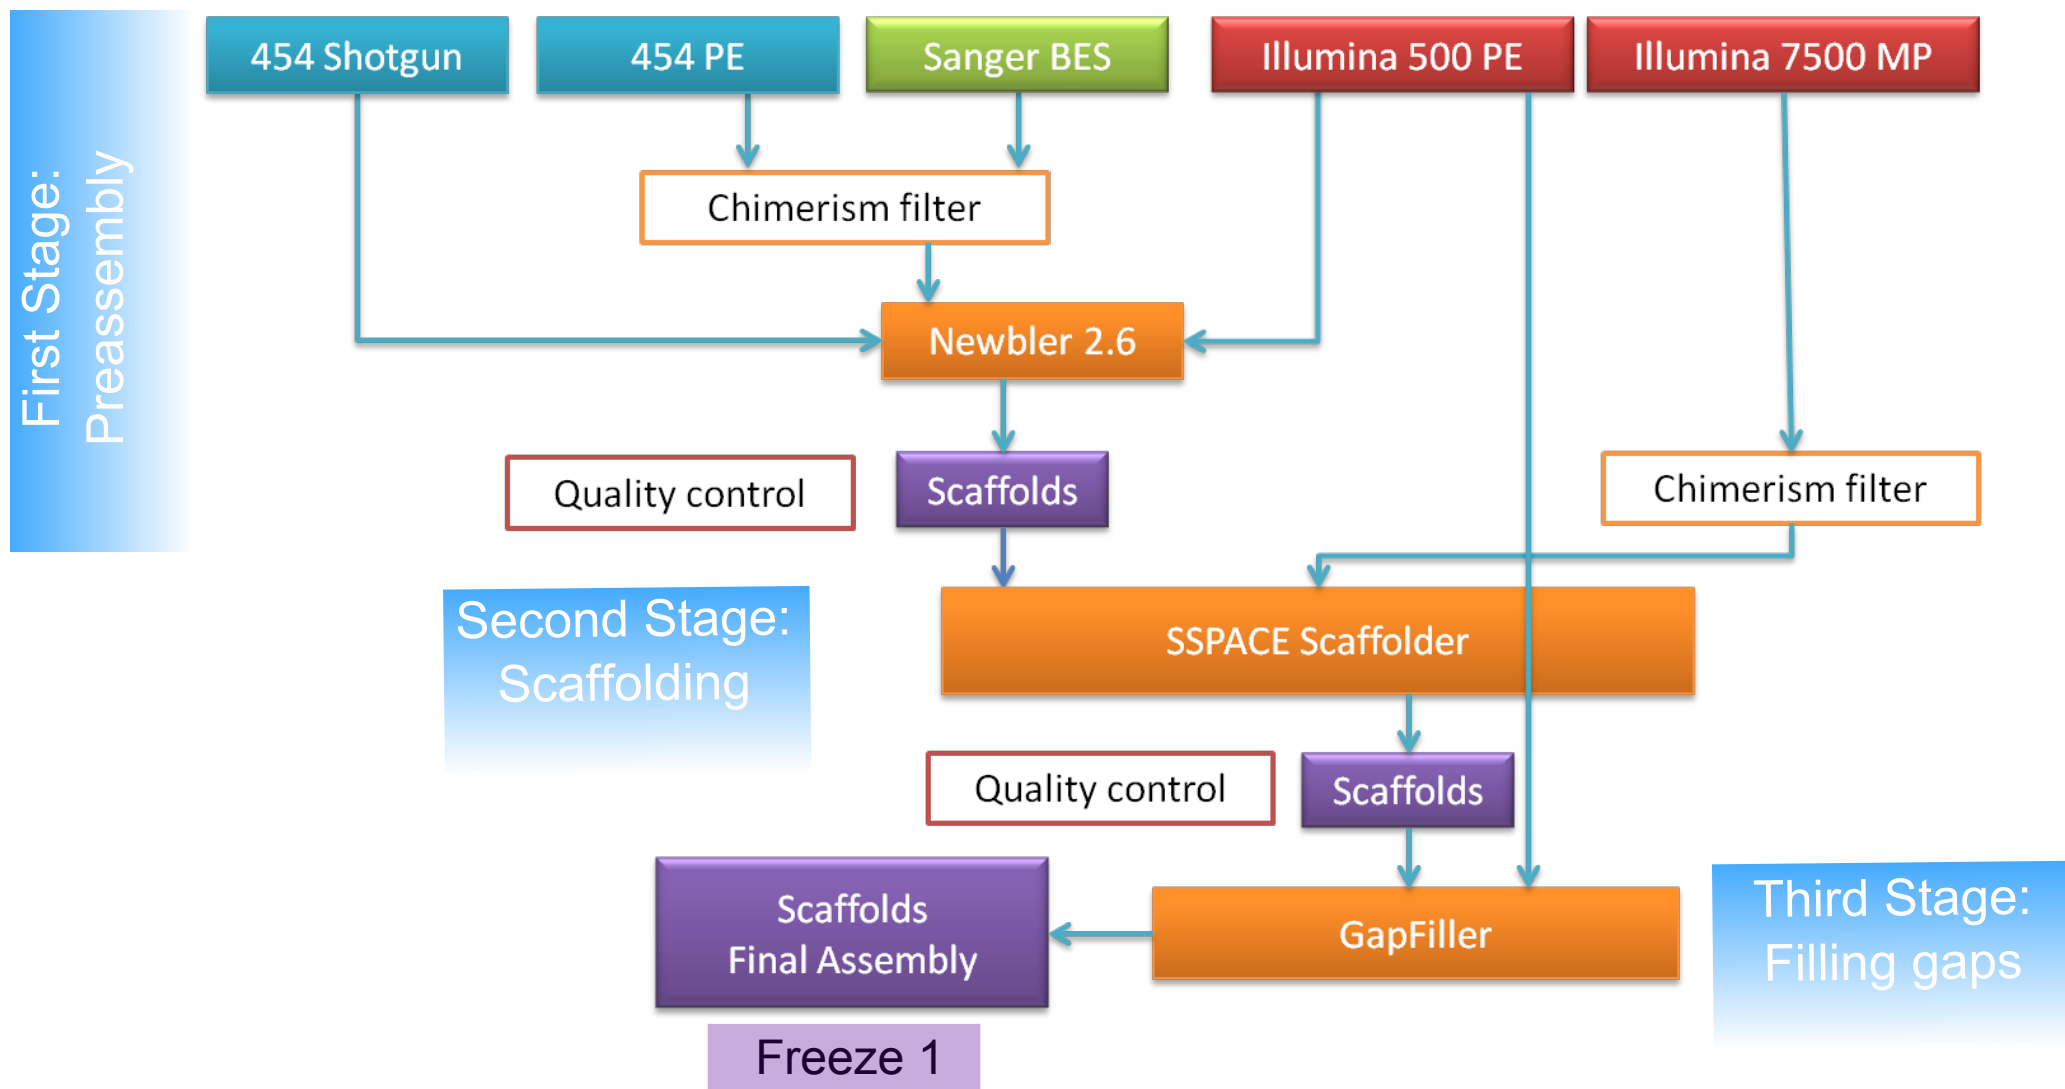

**Figure S2.** Assembly pipeline followed for st-1 *D. buzzatii* genome.

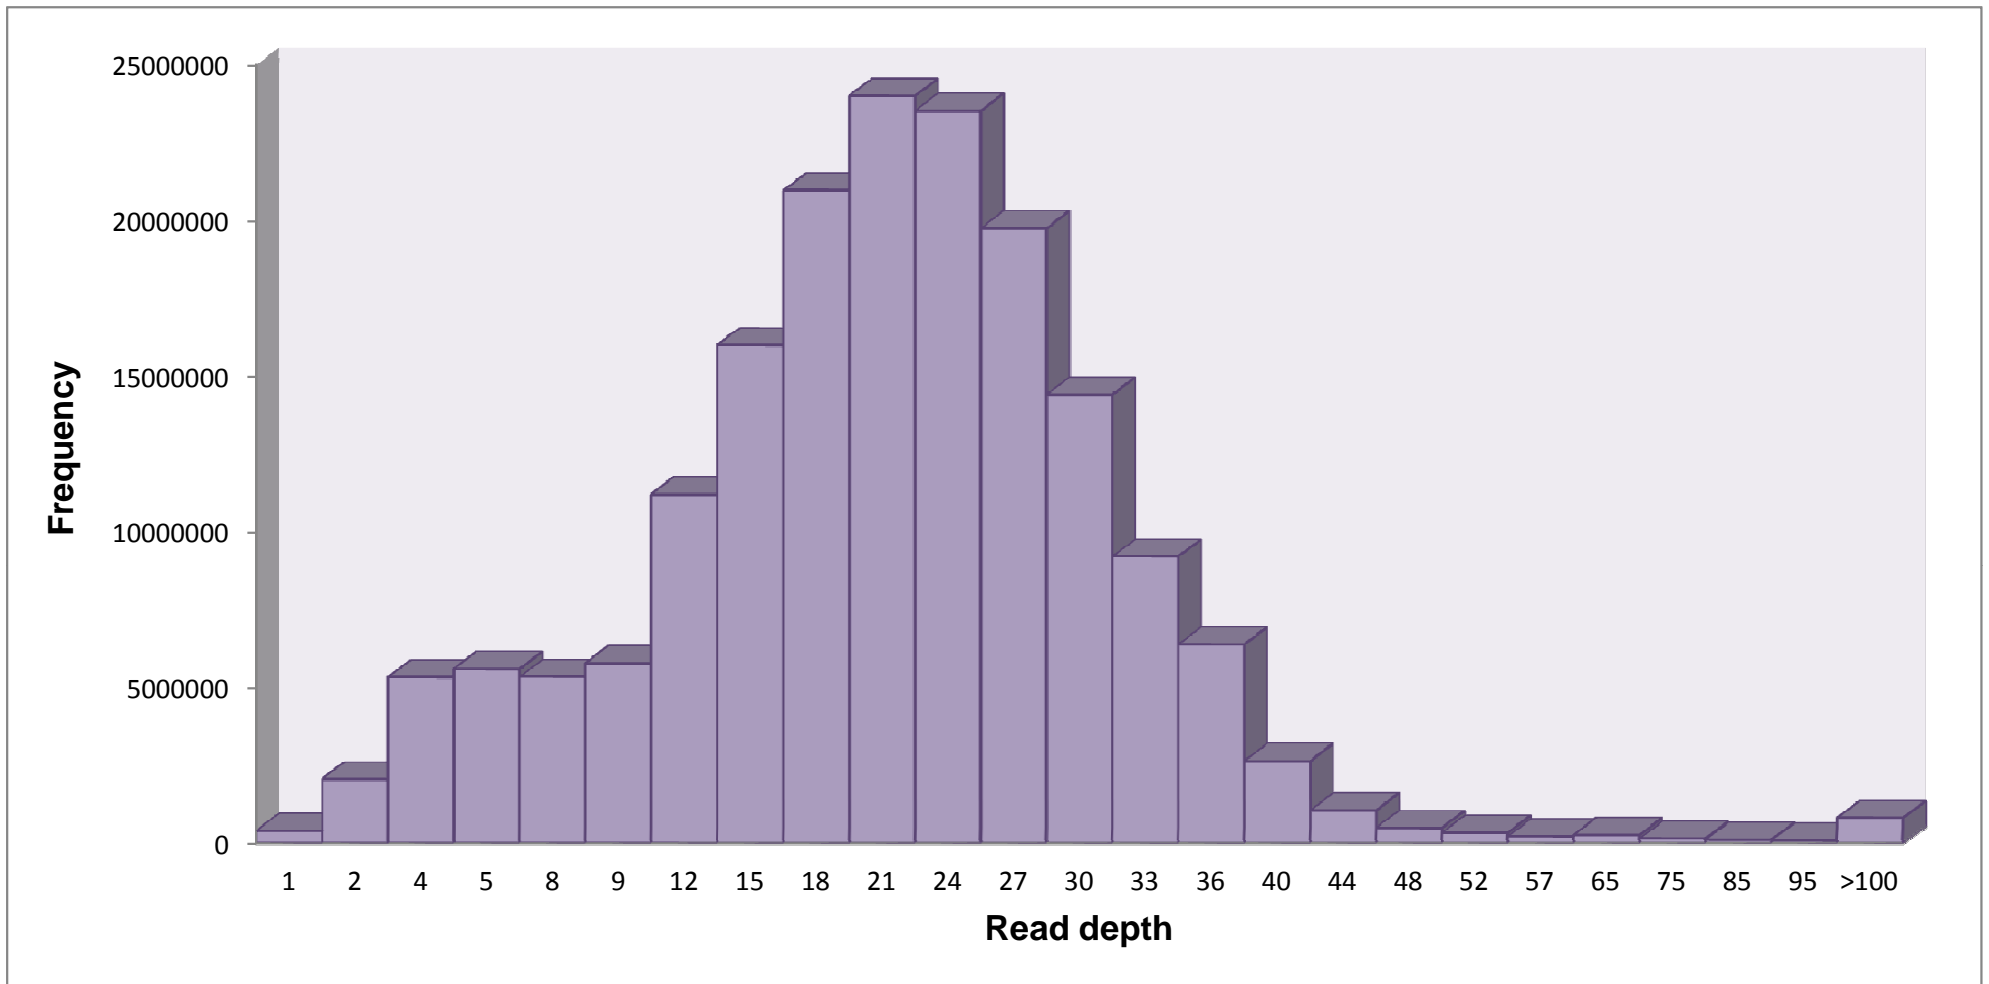

**Figure S3.** Read depth histogram of *D. buzzatii* preassembly.

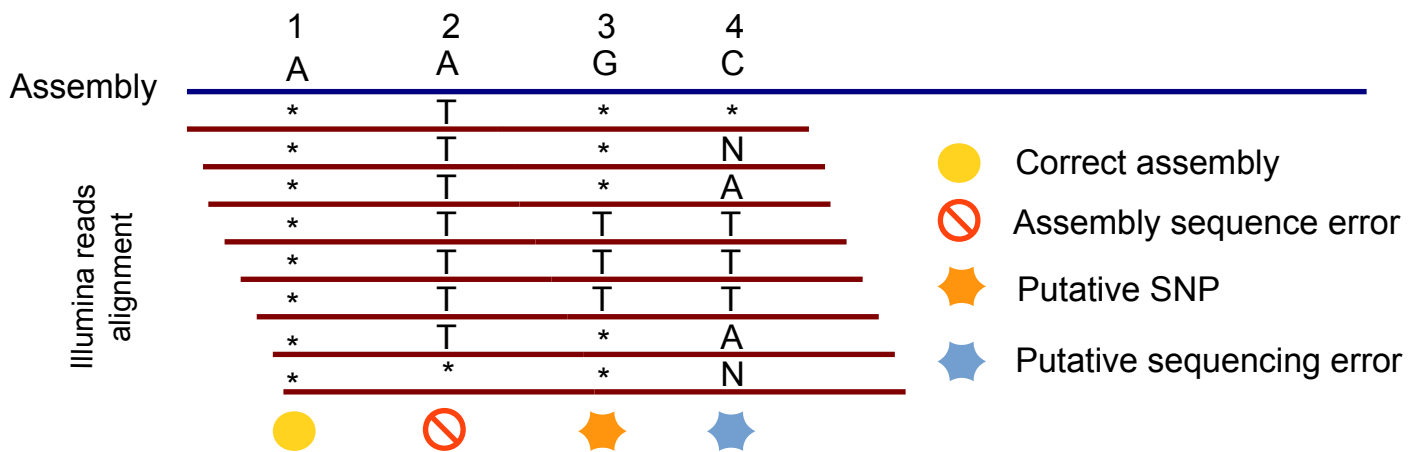

Position 1:  
 # reads covering position = 8  
 #mismatches = 0  
 Error rate = 0/8 = 0

Position 2:  
 # reads covering position = 8  
 #mismatches = 7  
 Error rate = 7/8 = 0,875 (>0.8 coverage)  
**>80% mismatches same base**

Position 3:  
 # reads covering position = 8  
 #mismatches = 3  
 Error rate = 3/8 = 0.345 (<0.8 coverage)

Position 4:  
 # reads covering position = 8  
 #mismatches = 7  
 Error rate = 7/8 = 0.875 (>0.8coverage)  
**<80% mismatches same base**

**Figure S4.** Algorithm designed to track putative sequence errors and polymorphic sites in freeze 1 assembly. Four different positions are described according to the results obtained by aligning Illumina reads. Positions with an error rate < 0.8 are considered correct positions (1). Positions in which more than 80% of the aligned reads having the same base do not match the assembly are pinpointing assembly errors (2). Polymorphic positions are detected if less than 80% but more than 20% of the aligned reads do not match the assembly and have the same base (3). Putative sequencing errors are detected when more than 80% of the bases do not match the assembly and they have random bases in the same position. This last category was not further analyzed.

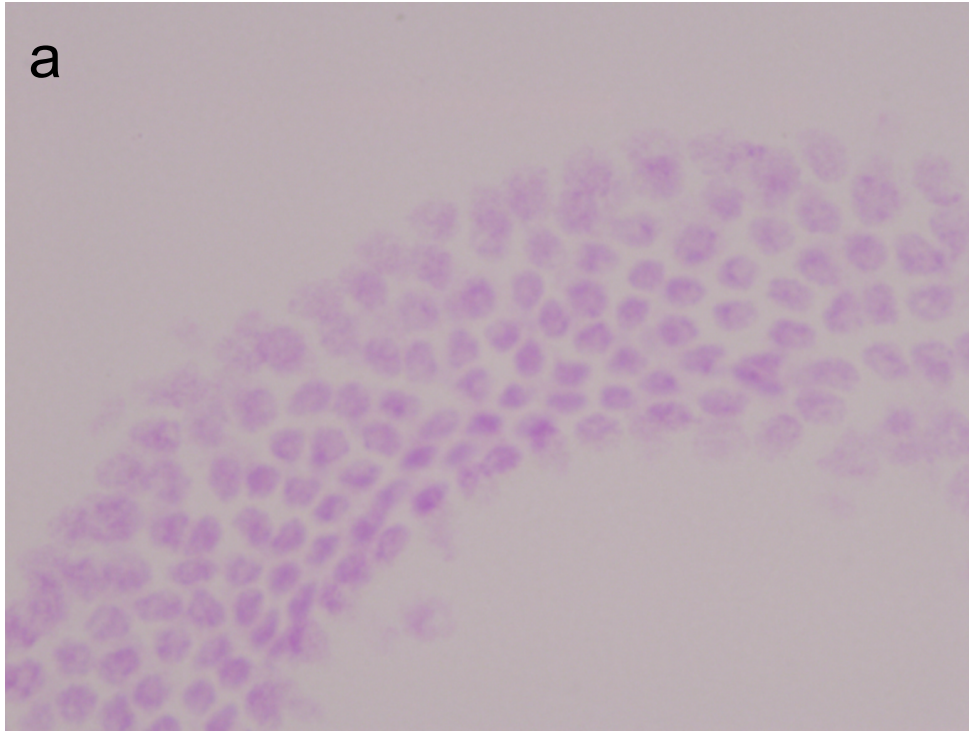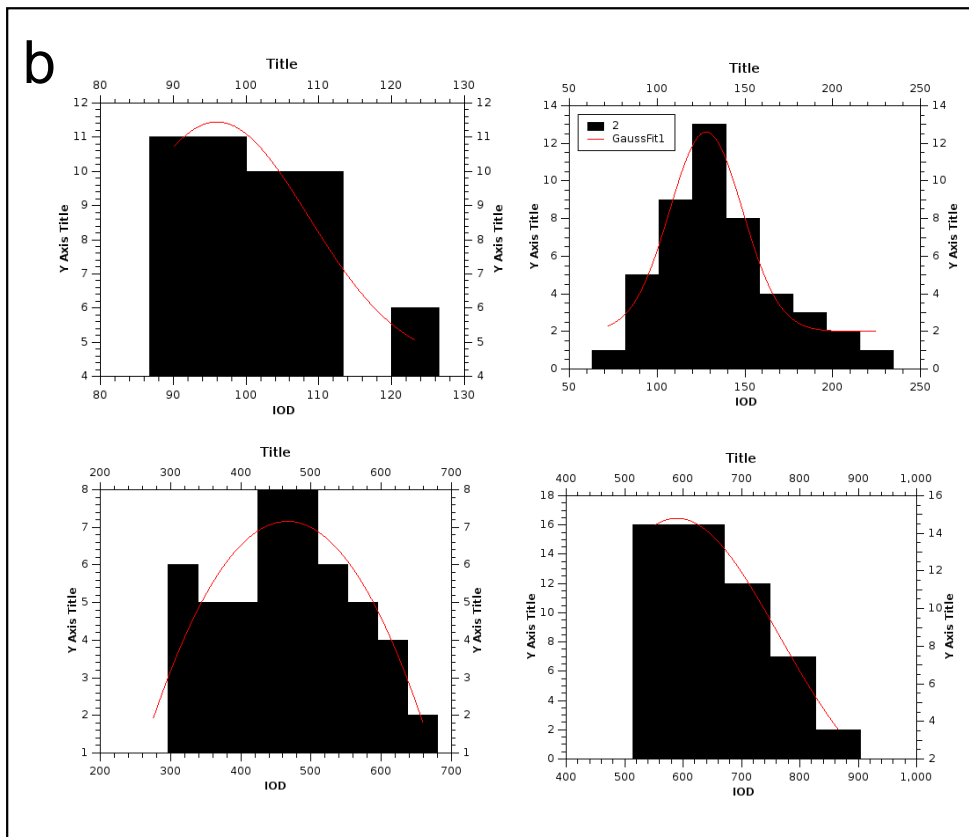

**Figure S5.** Genome size quantification of *D. buzzatii* st-1 and j-19 strains using IOD. Testicular cells analyzed from *D. buzzatii* st-1 strain (a) and normal distribution profiles that best fit to the IOD histogram representations (b). Fifty cells from each group were analyzed.

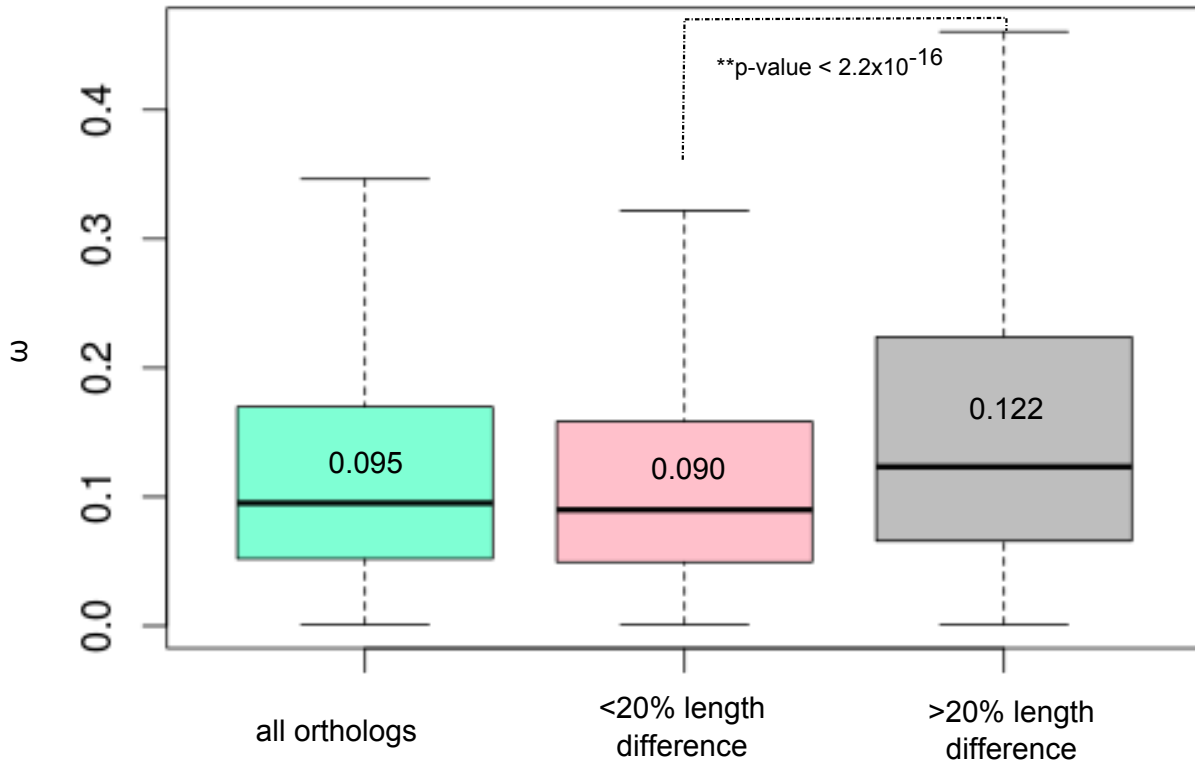

**Figure S6.** Distribution of dn/ds ( $=\omega$ ) for orthologs between *D. buzzatii* and *D. mojavensis*. Orthologous pairs that show a length difference higher than 20% increase the  $\omega$  median of all gene set.
